# Supplementary material
Source: publisher figshare collection journal article supplement (https://gsapubs.figshare.com/articles/dataset/_/22965632)
Supplement: Supplementary file 1 [file 1]

## Sheet: Sheet1
Item S2. Major- and minor-element electron-microprobe analyses (EMA) of individual glass shards of tephra beds correlated to Ibex Hollow tuff, University of Toronto, Canada. By John Westgate. This table contains original values obtained on analysis, and original totals, as well as plots of CaO versus Fe2O3 for individual samples.																	Sarna-Wojcicki, A.M., Knott, J.R., Westgate, J.A., Budahn, J.R., Barron, J., Bray, C.J., Ludvigson, G.A., Meyer, C.E., Miller, D.M., Otto, R.E., Pearce, N.J.G., Smith, C.C., Walkup, L.C., Wan, E., and Yount, J., 2023, Ibex Hollow Tuff from ca. 12 Ma supereruption, southern Idaho, identified across North America, eastern Pacific Ocean, and Gulf of Mexico: Geosphere, v. 19, https://doi.org/10.1130/…
Sample	SiO2	TiO2	Al2O3	FeOt	MnO	CaO	MgO	Na2O	K2O	Cl	Total	H2Od		FeOt	Fe2O3
Site 3E, Fig. 4. Ambrose Road tephra, northwestern Montana, sample from near top of tephra bed
UT2282-1	76.4889	0.276452	11.9937	1.98833	0.073366	0.577359	0.0478474	2.76345	5.75126	0.0393412	100	5.951		1.98833	2.20903
UT2282-2	76.2755	0.338298	12.084	2.14894	0.0170213	0.626596	0.0180851	2.37766	6.0883	0.0255319	100	6		2.14894	2.38747
UT2282-3	76.3969	0.311239	11.929	2.09263	0.0584236	0.650096	0.0562991	2.39006	6.08243	0.0329297	100	5.86		2.09263	2.32491
UT2282-4	76.7133	0.260445	11.9301	1.89707	0.0793123	0.584125	0	2.47797	6.01595	0.0417997	100	6.698		1.89707	2.10764
UT2282-5	76.368	0.341801	11.9015	2.01684	0.0488286	0.645387	0.0583821	2.83418	5.75753	0.0275988	100	5.793		2.01684	2.2407
UT2282-6	76.298	0.354919	12.0386	2.09338	0.04038	0.740654	0.0467558	2.67783	5.68614	0.0233779	100	5.894		2.09338	2.32575
UT2282-7	76.0827	0.326621	12.1114	2.00835	0.03911	0.683896	0.0517943	2.63728	6.01025	0.0486232	100	5.395		2.00835	2.23128
UT2282-8	77.0707	0.299363	11.9132	1.90408	0.0243299	0.582859	0.0476019	2.58108	5.53346	0.0433706	100	5.466		1.90408	2.11543
UT2282-9	76.7617	0.291533	12.0094	1.8688	0.0395118	0.607627	0.0234935	2.59603	5.76872	0.0331044	100	6.357		1.8688	2.07624
UT2282-10	76.683	0.289541	11.8701	2.05311	0.0326391	0.669629	0.0789657	2.41214	5.89505	0.0157931	100	5.022		2.05311	2.281
UT2282-11	76.4109	0.2798	12.0102	2.04551	0.0158977	0.596695	0.0328553	2.75879	5.81857	0.0307356	100	5.647		2.04551	2.27256
UT2282-12	76.1568	0.345706	11.9813	2.07212	0.00317162	0.672383	0.00845764	2.49712	6.25548	0.00740044	100	5.411		2.07212	2.30213
UT2282-13	76.3603	0.252611	11.971	2.07162	0.041221	0.603518	0.0264237	2.67197	5.97176	0.0295946	100	5.388		2.07162	2.30157
UT2282-14	76.3935	0.32582	12.1162	2.01902	0	0.62066	0.0427305	2.74757	5.69704	0.0373892	100	6.39		2.01902	2.24313
UT2282-15	76.2086	0.285117	12.1037	2.00638	0.0432955	0.71068	0.0612473	2.44989	6.10995	0.0211198	100	5.302		2.00638	2.22909
UT2282-16	76.7152	0.208866	11.97	1.85541	0.0519514	0.566164	0.0233251	2.52229	6.0306	0.0561923	100	5.681		1.85541	2.06136
UT2282-17	76.8161	0.281042	11.9518	1.87362	0.0447113	0.564214	0.00319366	2.55174	5.85718	0.0564214	100	6.064		1.87362	2.08159
UT2282-18	76.0569	0.323484	12.2181	2.06818	0.0275757	0.610907	0.0403029	2.19014	6.45271	0.0116666	100	5.714		2.06818	2.29774
UT2282-19	76.4558	0.292796	11.9349	2.04006	0.0264257	0.673326	0.0602505	2.29269	6.16881	0.0549654	100	5.395		2.04006	2.26651
UT2282-20	76.4798	0.327023	12.0043	2.07044	0.0743234	0.667849	0.0254823	2.77969	5.5201	0.0509646	100	5.817		2.07044	2.30026
average	76.4596	0.300624	12.0021	2.00969	0.0390748	0.632731	0.0376747	2.56048	5.92356	0.034396		5.76225			2.23277
stdev	0.263632	0.0362647	0.0875638	0.0854778	0.021908	0.0497898	0.0212918	0.176248	0.239228	0.0146596		0.412977			0.0949659
Site 3E, Fig. 4. Ambrose Road tephra, northwestern Montana, sample from near base of tephra bed.
UT2283-1	77.0844	0.31661	11.939	1.83189	0.0127067	0.626866	0.0487092	2.50535	5.58991	0.0444736	100	5.562		1.83189	2.03523
UT2283-2	76.5748	0.335952	11.8817	2.11565	0.0255154	0.638947	0.0754829	2.75885	5.58148	0.0116945	100	5.939		2.11565	2.35049
UT2283-3	76.7602	0.307087	11.833	2.05079	0.0425035	0.686431	0.0414409	2.69153	5.56795	0.0191266	100	5.89		2.05079	2.27843
UT2283-4	76.9896	0.243598	11.8732	1.90177	0.0662414	0.621815	0.0619678	2.68812	5.54719	0.00641046	100	6.403		1.90177	2.11287
UT2283-5	76.2012	0.303987	11.9818	2.14075	0.0214075	0.655071	0.0588708	2.71555	5.87851	0.0428151	100	6.575		2.14075	2.37838
UT2283-6	76.4705	0.298568	11.9533	2.13566	0.00212504	0.7257	0.0297505	2.74449	5.60054	0.0393132	100	5.884		2.13566	2.37272
UT2283-7	76.3706	0.336865	11.8817	2.10408	0.01594	0.704547	0.0775746	2.72574	5.7554	0.0276293	100	5.897		2.10408	2.33763
UT2283-8	76.7309	0.318099	11.859	2.02136	0.0691519	0.670241	0.0180859	2.48734	5.77471	0.051066	100	6.004		2.02136	2.24573
UT2283-9	76.6411	0.318922	11.7958	2.09425	0.0287029	0.629339	0.0712258	2.64918	5.74165	0.029766	100	5.933		2.09425	2.32671
UT2283-10	76.1137	0.256649	12.0223	2.05953	0.0158425	0.611521	0.0718194	2.85165	5.97368	0.0232357	100	5.318		2.05953	2.28813
UT2283-11	76.3522	0.302201	12.1155	2.19783	0	0.648781	0.017963	2.75468	5.57804	0.0327561	100	5.361		2.19783	2.44178
UT2283-12	76.0191	0.34033	12.0092	2.02909	0	0.702131	0.0279135	2.61206	6.26013	0	100	6.855		2.02909	2.25432
UT2283-13	76.4042	0.304762	12.1386	2.13757	0.0433862	0.70582	0.0507937	2.67937	5.50476	0.0306878	100	5.5		2.13757	2.37484
UT2283-14	76.1751	0.236351	12.002	2.15154	0.00105987	0.709054	0.0720713	2.57231	6.05081	0.0296764	100	5.649		2.15154	2.39036
UT2283-15	76.0113	0.325705	12.0309	2.19612	0.0403153	0.78827	0.0434981	2.38285	6.15021	0.0307669	100	5.743		2.19612	2.43989
UT2283-16	76.2757	0.375314	11.9708	2.15222	0	0.763351	0	2.82864	5.62229	0.0116623	100	5.679		2.15222	2.39112
UT2283-17	76.0976	0.337546	12.0156	2.08856	0.099154	0.626569	0.043248	2.69193	5.96928	0.0305901	100	5.198		2.08856	2.32039
UT2283-18	75.8708	0.279546	12.029	2.08331	0.0265728	0.707901	0.0414536	1.90262	7.0333	0.0255099	100	5.919		2.08331	2.31456
UT2283-19	76.8401	0.31614	11.8022	1.86714	0.00212175	0.527254	0.0392523	2.81556	5.786	0.00424349	100	5.738		1.86714	2.07439
UT2283-20	76.5994	0.347387	11.9273	2.17513	0.0781357	0.631421	0.0411796	2.76009	5.42199	0.0179501	100	5.293		2.17513	2.41657
average	76.4291	0.310081	11.9531	2.07671	0.0295441	0.669052	0.046615	2.64089	5.81939	0.0254687		5.817			2.30723
stdev	0.342115	0.0348542	0.096306	0.1038	0.0292716	0.0594587	0.0213847	0.210616	0.365797	0.0138201		0.424544			0.115322
Site 4E, Fig. 4. Richmond, northeastern Montana (" CT-1" Tuff of Collier and Thom).
UT2289-1	76.8238	0.268091	11.9821	1.81323	0.0864248	0.660855	0	2.85251	5.45407	0.058865	100	5.18811		1.81323	2.0145
UT2289-2	76.899	0.12948	12.0698	1.84586	0.03288	0.659652	0.00913839	2.98671	5.33765	0.0298261	100	6.38393		1.84586	2.05075
UT2289-3	76.7008	0.243443	12.0191	1.75273	0.0487882	0.652924	0	3.06528	5.51698	0	100	5.32142		1.75273	1.94728
UT2289-4	76.8867	0.23204	12.0826	1.87018	0	0.638675	0.00908862	2.86697	5.4038	0.00990335	100	5.98132		1.87018	2.07777
UT2289-5	76.7518	0.205267	12.2339	1.66544	0.0379927	0.597154	0.00903469	2.94261	5.50748	0.049271	100	5.55297		1.66544	1.85031
UT2289-6	76.104	0.217805	12.4251	1.83985	0.0108408	0.670942	0	3.03296	5.63948	0.0590188	100	5.47752		1.83985	2.04407
UT2289-7	76.5309	0.0892547	11.8903	1.9525	0.0269746	0.690852	0.0428371	3.3847	5.37206	0.0196082	100	4.93277		1.9525	2.16923
UT2289-8	76.8477	0.140737	11.8102	1.9412	0	0.626368	0.015822	3.24964	5.30929	0.0590088	100	5.35986		1.9412	2.15667
UT2289-9	76.5135	0.203312	12.0863	1.52632	0.171991	0.573826	0.0470067	3.1592	5.63061	0.0878756	100	4.78585		1.52632	1.69574
UT2289-10	76.9718	0.219392	12.0195	1.79846	0	0.595438	0	2.86858	5.47726	0.0495463	100	6.06365		1.79846	1.99809
UT2289-11	76.7099	0.0783229	12.2509	1.71387	0.0662915	0.646684	0	2.96421	5.54981	0.0200233	100	7.01825		1.71387	1.90411
UT2289-12	76.5593	0.28338	11.9503	1.81122	0.0109	0.744039	0.07726	2.99494	5.46984	0.0988698	100	5.91772		1.81122	2.01227
UT2289-13	76.6846	0.10342	12.302	1.91452	0	0.578375	0	3.00901	5.38825	0.0198627	100	6.01985		1.91452	2.12703
UT2289-14	76.449	0.269846	12.2106	1.90534	0.179487	0.618751	0.0612414	2.83122	5.47444	0	100	5.75827		1.90534	2.11684
UT2289-15	76.8009	0.230253	12.0569	1.70127	0.119071	0.621116	0.0225395	2.95114	5.47718	0.0196587	100	5.30417		1.70127	1.89011
UT2289-16	76.9689	0.219415	11.9971	1.86887	0.103802	0.691164	0.00911252	2.92732	5.21429	0	100	5.97557		1.86887	2.07631
UT2289-17	76.905	0.115331	12.3153	1.79391	0.00542188	0.560511	0.0338473	2.94986	5.27149	0.0492645	100	5.47551		1.79391	1.99303
UT2289-18	76.1136	0.229201	12.0351	2.00813	0	0.67463	0.0540086	3.19128	5.69404	1.05249e-06	100	4.98737		2.00813	2.23104
UT2289-19	76.9418	0.142205	12.0697	1.79363	0.0382967	0.591279	0.0182381	2.98256	5.39253	0.029785	100	6.23479		1.79363	1.99272
UT2289-20	76.6316	0.0514743	12.2492	1.93185	0.0054449	0.753879	0.079336	2.76955	5.45854	0.0691747	100	5.83844		1.93185	2.14629
average	76.6897	0.183584	12.1028	1.82242	0.0472304	0.642356	0.0244256	2.99901	5.45196	0.0364781		5.67887			2.02471
stdev	0.253328	0.0704569	0.156292	0.113371	0.056844	0.0531932	0.0267647	0.150654	0.122149	0.0297803		0.546453			0.125955
Site 5E, Scobey, northeastern Montana (Fouhy tephra)
UT2286-1	76.9147	0.103874	12.1996	1.88802	0.00560434	0.692038	0.0263211	2.74445	5.39364	0.0316763	100	6.8579		1.88802	2.09759
UT2286-2	76.9354	0.142174	11.9054	1.94222	0	0.64698	0.044754	2.84383	5.47225	0.0669904	100	6.44188		1.94222	2.1578
UT2286-3	76.7266	0.141725	12.0078	2.03822	0.011122	0.640089	-0.00155598	2.83961	5.53354	0.0628465	100	6.16818		2.03822	2.26446
UT2286-4	76.3235	0.154919	12.1115	1.9832	0.0445583	0.661379	0.0492382	2.43568	6.18106	0.0549984	100	6.32269		1.9832	2.20334
UT2286-5	76.9894	0.181857	11.8374	1.99649	0.00560691	0.732001	0.0139641	2.78246	5.41729	0.0435639	100	6.91837		1.99649	2.21811
UT2286-6	76.796	0.128318	11.8586	2.01318	0.0664456	0.657313	0.0214255	2.46915	5.99351	-0.00392623	100	5.76201		2.01318	2.23664
UT2286-7	76.8983	0.220243	11.8983	1.88795	0.01677	0.703016	0.0277807	2.47905	5.82519	0.0434036	100	6.63674		1.88795	2.09751
UT2286-8	76.5903	0.181015	12.1664	2.13638	0	0.773083	0.0247168	2.67116	5.43334	0.0236503	100	6.51281		2.13638	2.37352
UT2286-9	76.6137	0.0261531	11.9803	1.84566	0.00563927	0.665088	0.0341998	2.29923	6.47037	0.059644	100	7.45256		1.84566	2.05053
UT2286-10	76.5866	0.130105	12.2272	1.99476	JW	0.725799	0.0186357	2.75535	5.53088	0.0475868	100.017	7.06033		1.99476	2.21617
UT2286-11	77.047	0.245488	12.0119	1.91419	0.0223121	0.678583	0.0185177	2.86634	5.1523	0.0433654	100	6.41384		1.91419	2.12667
UT2286-12	76.4579	0.154109	12.0394	1.84501	JW	0.704585	0.0366453	2.27469	6.4402	0.058566	100.011	5.75597		1.84501	2.0498
UT2286-13	76.5805	0.116244	12.0595	2.0029	0.0445833	0.646876	0.0323203	2.40375	6.074	0.039319	100	6.36846		2.0029	2.22523
UT2286-14	76.8194		11.9758	2.05933	JW	0.715708	0.0416064	2.29586	6.14322	0.0827899	100.134	6.5961		2.05933	2.28791
UT2286-15	76.3092	0.129335	12.3559	1.98725	0.0446481	0.709367	0.0370069	2.52176	5.84652	0.0590855	100	6.50665		1.98725	2.20784
UT2286-16	76.7697	0.077708	12.1854	1.87129	0.0111775	0.638496	0.0308858	2.75286	5.62697	0.0355259	100	6.59781		1.87129	2.07901
UT2286-17	76.8501	0.1798	11.9777	2.03859	0.0221737	0.650305	0.0199302	2.62909	5.63621	-0.00393037	100	5.86126		2.03859	2.26487
UT2286-18	76.6084	0.205219	12.0754	1.89471	JW	0.759513	0.03215	2.8114	5.61966	0.0156285	100.022	5.70449		1.89471	2.10503
average	76.712	0.148134	12.0485	1.9633	0.0214744	0.688901	0.0282524	2.60421	5.76612	0.0422658		6.441			2.18122
stdev	0.217216	0.0531518	0.138983	0.0814496	0.0206426	0.0414796	0.0121859	0.207494	0.377499	0.0232789		0.473298			0.0904906
Site 6E, Fig. 4. Tephra bed at Ashfall Fossil Beds State Park, Orchard, Nebraska. Same sample as USGS Orchard-N1 T615-2, analysed at USGS, Menlo Lab, Calif.
UT2425-1	76.4109	0.295974	11.8601	1.84984	0.0285403	0.621545	0.0443961	1.7177	7.14776	0.0232551	100	5.397		1.84984	2.05517
UT2425-2	76.4798	0.249099	11.8667	1.82319	0.01166	0.575578	0.0402798	1.99067	6.94191	0.0211999	100	5.66		1.82319	2.02557
UT2425-3	76.4244	0.350154	12.0899	2.04968	0.0533772	0.590352	0.0437693	2.12868	6.24406	0.025621	100	6.327		2.04968	2.2772
UT2425-4	76.6028	0.32704	11.9391	1.95375	0.0488437	0.61267	0.0658328	2.32645	6.12351	0	100	5.822		1.95375	2.17061
UT2425-5	76.0241	0.307902	12.0668	2.13081	0.00532703	0.634982	0.0458124	1.20071	7.53881	0.044747	100	6.139		2.13081	2.36733
UT2425-6	76.3332	0.2707	11.8771	1.88542	0.0231728	0.618292	0.0526654	1.48516	7.44689	0.00737316	100	5.061		1.88542	2.0947
UT2425-7	76.3774	0.325033	11.9902	2.0116	0.0349384	0.62148	0.0423496	2.45416	6.13116	0.0116461	100	5.548		2.0116	2.23489
UT2425-8	76.3896	0.299353	12.0073	1.84958	0.0192441	0.629711	0.044903	1.74587	6.99845	0.0160368	100	6.465		1.84958	2.05488
UT2425-9	76.8734	0.280968	11.9582	1.84119	0.035121	0.601313	0.0212854	2.12535	6.22599	0.0372495	100	6.039		1.84119	2.04556
UT2425-10	76.5515	0.298996	11.8943	1.84892	0.020074	0.561014	0.00950872	1.18331	7.60169	0.0306392	100	5.35		1.84892	2.05415
UT2425-11	76.3959	0.352016	12.0682	2.03575	0.0880039	0.638293	0.0402909	2.45245	5.91111	0.0180249	100	5.686		2.03575	2.26172
UT2425-12	76.5214	0.316405	11.7938	2.02119	0.00317464	0.694187	0.0582017	2.12701	6.42546	0.0391539	100	5.501		2.02119	2.24554
UT2425-13	75.9826	0.357497	12.2232	2.09163	0.0608279	0.592272	0.0554921	2.36482	6.23646	0.0352162	100	6.293		2.09163	2.3238
UT2425-14	76.0498	0.281133	11.8911	2.02923	0	0.681696	0.0539015	1.98273	6.98606	0.0443895	100	5.383		2.02923	2.25448
UT2425-15	75.793	0.300846	11.9547	2.09008	0.0358903	0.769531	0.0802255	2.24526	6.7305	0	100	5.267		2.09008	2.32208
UT2425-17	76.2702	0.324356	11.9822	2.03911	0.0179611	0.697313	0.029583	2.0201	6.60757	0.0116219	100	5.351		2.03911	2.26545
UT2425-18	76.0744	0.32426	12.0219	2.00682	0.0454176	0.608384	0.0433051	2.02478	6.83165	0.019012	100	5.323		2.00682	2.22958
UT2425-19	76.8725	0.21741	11.7614	1.77978	0.0575497	0.483843	0.0500895	1.59327	7.15108	0.0330378	100	6.168		1.77978	1.97733
UT2425-20	76.1263	0.324313	11.8475	2.09474	0.0414695	0.798554	0	1.8236	6.92434	0.0191398	100	5.955		2.09474	2.32726
UT2425-21	76.1815	0.328392	11.9411	2.07237	0.047824	0.658909	0.043573	2.50279	6.19799	0.0255061	100	5.905		2.07237	2.30241
UT2425-22	76.0789	0.301606	12.0166	2.01071	0.0412725	0.721739	0.011641	2.31232	6.4893	0.015874	100	5.506		2.01071	2.2339
UT2425-24	76.3619	0.316577	11.8823	2.02907	0.0403688	0.674585	0.0488675	2.16929	6.46114	0.0159351	100	5.868		2.02907	2.25429
UT2425-25	75.9464	0.283902	12.0231	2.07913	0.0147756	0.706061	0.0390497	1.79523	7.068	0.0443267	100	5.249		2.07913	2.30992
UT2425-26	76.4309	0.294468	11.9722	1.84973	0.0329549	0.626143	0.0435855	1.95284	6.76213	0.035081	100	5.932		1.84973	2.05505
UT2425-27	76.4646	0.332247	11.8707	2.01684	0.00636895	0.62628	0.0350292	2.33422	6.28403	0.0297218	100	5.793		2.01684	2.2407
UT2425-28	76.1509	0.303596	11.9225	1.91856	0.021083	0.626166	0.0442744	2.45934	6.49885	0.0548159	100	5.137		1.91856	2.13152
UT2425-29	76.6536	0.318007	11.6833	1.88252	0.00531785	0.575391	0	2.04737	6.80472	0.0297799	100	5.977		1.88252	2.09148
UT2425-30	76.7931	0.266188	11.8633	1.84853	0	0.631668	0.0697159	2.50238	5.96282	0.0623217	100	5.33		1.84853	2.05371
average	76.3434	0.305301	11.9382	1.96928	0.0300199	0.638498	0.0413439	2.03814	6.66905	0.0268116		5.694			2.18787
stdev	0.278687	0.031093	0.110089	0.103617	0.0213806	0.064198	0.0190452	0.36677	0.472186	0.0153093		0.388681			0.115119
Site 7E, southern Alabama near Mobile Bay. Drill cuttings from oil industry well, (First Energy Corp.n, W.B. Boswell 8-13 No. 1), at depth 1840 ft.
Same sample as USGS BOSWELL-1840 T194-7.
UT2409-1	77.4323	0	12.4578	1.87903	0.00547974	0.65305	0.0114686	4.04265	3.48824	0.029939	100	6.30942		1.87903	2.0876
UT2409-2	77.7561	0.271337	12.2234	1.78349	0.104051	0.685637	0.0481481	3.97825	3.14959	0	100	6.28076		1.78349	1.98145
UT2409-3	76.8459	0.0650391	12.5421	1.95795	0.033068	0.651609	0.0854269	3.8805	3.93838	0	100	6.83149		1.95795	2.17528
UT2409-4	78.6364	0.0908351	12.7397	0.914148	0	0.698631	0.00911487	3.77263	3.08847	0.0500694	100	6.25207		0.914148	1.01562
UT2409-6	77.0467	0.335816	12.4151	2.03489	0	0.682945	0.0757021	3.91638	3.47257	0.0199298	100	6.25101		2.03489	2.26076
UT2409-7	77.8561	0.327881	12.4093	2.00766	0.116814	0.648447	0	3.7237	2.82907	0.0809913	100	7.55675		2.00766	2.23051
UT2409-8	78.0522	0.26056	12.324	1.43611	0.0773005	0.558108	0.0969481	4.16289	3.03184	1.07393e-06	100	6.88416		1.43611	1.59552
UT2409-10	77.1693	0.155792	12.3631	2.04736	0.060519	0.671089	0.119785	3.67464	3.73849	0	100	6.66891		2.04736	2.27461
UT2409-11	76.6421	0.3481	12.4749	1.91642	0.0874181	0.601812	0.0458604	4.1846	3.58941	0.10939	100	6.12811		1.91642	2.12914
UT2409-12	77.3426	0.262194	12.073	2.10729	0.0555646	0.724734	0.0605179	3.50256	3.8715	0	100	7.45545		2.10729	2.3412
UT2409-14	76.941	0.285957	12.5207	1.91803	0.0716198	0.663803	0.0577572	4.04705	3.45404	0.0400915	100	6.76318		1.91803	2.13093
UT2409-15	76.8062	0.296128	12.3007	2.00464	0.0545348	0.683869	0.0364965	3.49376	4.21461	0.109087	100	5.94991		2.00464	2.22716
UT2409-16	77.3978	0.207572	12.3007	2.05052	0.0549903	0.641877	0.0161374	3.91448	3.40588	0.0100101	100	6.61452		2.05052	2.27813
UT2409-17	76.6103	0.0779373	12.5219	2.08954	0.0110079	0.700096	0.083184	4.10585	3.79017	0.01001	100	6.70319		2.08954	2.32147
UT2409-19	76.9424	0.219867	12.2806	1.95974	0.142521	0.65811	0.0759446	4.12597	3.59482	0	100	6.37519		1.95974	2.17727
UT2409-20	77.302	0.349545	12.6394	1.92079	0.0493884	0.756848	0.0482099	3.77604	3.00794	0.149919	100	6.40509		1.92079	2.134
average	77.2987	0.22216	12.4116	1.87672	0.0577673	0.667541	0.0544189	3.89387	3.47906	0.0380899		6.58933			2.08504
stdev	0.553441	0.111932	0.165048	0.301595	0.0420872	0.0461902	0.0342846	0.220355	0.38361	0.0485086		0.44609			0.335072
Site 9W, Fig. 4. DSDP Hole 173-21-4, northeastern Pacific Ocean near Cape Mendocino, California. Same sample as USGS sample DSDP 173-21-4
(27-28 cm)
UT2408-1	76.9284	0.260971	12.3313	1.2727	0	0.893725	0.181723	3.55019	4.32033	0.260625	100	6.89004		1.2727	1.41397
UT2408-2	76.7423	0.296856	11.8479	1.79493	0.087402	0.644586	0.0547184	3.08209	5.44926	0	100	6.10289		1.79493	1.99417
UT2408-3	76.4448	0.21833	12.2612	1.96148	0.0489262	0.685207	0.0658335	3.17664	5.13762	0	100	5.66813		1.96148	2.1792
UT2408-4	76.2359	0.409417	12.0899	1.97224	0.0324946	0.641544	0.108649	3.2727	5.15842	0.0786859	100	5.40877		1.97224	2.19116
UT2408-5	76.7934	0.140837	12.2401	1.86424	0.113817	0.624065	0.0542891	3.23527	4.9339	0	100	5.47825		1.86424	2.07117
UT2408-6	75.9	0.464631	12.1945	1.95864	0.0163882	0.665243	0.0296844	3.16585	5.49606	0.108953	100	6.07853		1.95864	2.17605
UT2408-7	77.115	0.295822	11.8193	1.82785	0.0272226	0.611264	0.0431903	3.28792	4.94281	0.0296799	100	5.82839		1.82785	2.03075
UT2408-8	76.5403	0.410676	12.3047	1.97633	0.0162978	0.568919	0.0452912	2.89087	5.1973	0.0493358	100	5.50271		1.97633	2.1957
UT2408-9	76.0813	0.191643	12.2376	2.01356	0.0811027	0.630708	0.0768017	3.14539	5.5419	0	100	5.27689		2.01356	2.23707
UT2408-10	76.8665	0.155804	11.9819	1.86154	0.021983	0.731551	0.045882	3.16099	5.11399	0.0598284	100	6.57776		1.86154	2.06817
UT2408-11	76.6204	0.091408	12.0585	1.97395	0.0110556	0.704408	0.0900749	3.14441	5.30575	0	100	7.06068		1.97395	2.19306
UT2408-12	76.5602	0.129198	12.1199	1.98693	0.0273361	0.650679	0	2.84152	5.63462	0.0495824	100	6.14616		1.98693	2.20748
UT2408-13	76.449	0.142435	12.1695	1.94471	0.0274038	0.672658	0.0206079	3.22085	5.27336	0.0795442	100	6.38538		1.94471	2.16057
UT2408-14	75.9836	0.348139	12.2877	2.29533	0.0491406	0.806698	0.0548554	3.07312	5.10143	0	100	6.08589		2.29533	2.55011
UT2408-15	76.4117	0.422488	12.5579	1.97798	0.00541997	0.654637	0.0339058	3.00594	4.90051	0.0295501	100	5.47925		1.97798	2.19753
UT2408-16	76.8116	0.309524	11.9256	1.91279	0.0109198	0.605164	0.102674	3.33613	4.9856	0	100	5.88637		1.91279	2.12511
UT2408-17	75.9252	0.230436	12.2786	1.93596	0.0541652	0.665371	0.083654	3.0682	5.71914	0.0393146	100	5.41163		1.93596	2.15085
UT2408-18	76.603	0.143532	12.1408	1.82331	0.060758	0.732552	0.0968473	3.13338	5.26581	0	100	6.81727		1.82331	2.0257
UT2408-19	76.1284	0.465241	12.4804	1.95827	0.120401	0.668449	0.0937527	3.09566	4.96962	0.0198629	100	6.26726		1.95827	2.17564
UT2408-20	76.4194	0.0895505	12.2598	1.90197	0	0.644397	0.0608932	3.0037	5.57123	0.0491364	100	5.3227		1.90197	2.11308
average	76.478	0.260847	12.1793	1.91074	0.0406117	0.675091	0.0671664	3.14454	5.20093	0.0427049		5.98375			2.12283
stdev	0.349347	0.126197	0.189931	0.18202	0.0360546	0.0731387	0.039598	0.156711	0.324931	0.0608801		0.55249			0.202224
ATHO-G Glass Standard
Atho-g-1	75.516	0.313	12.195	3.32892	0.098	1.722	0.085	3.913	2.555	0.033	99.7589
Atho-g-2	75.933	0.298	12.078	3.3243	0.148	1.701	0.071	3.968	2.622	0.059	100.202
Atho-g-3	75.199	0.343	12.128	3.20039	0.141	1.664	0.057	3.758	2.614	0.046	99.1504
Atho-g-4	75.653	0.321	12.166	3.18744	0.093	1.693	0.046	3.887	2.588	0.043	99.6774
Atho-g-5	75.702	0.296	12.315	3.35019	0.132	1.693	0.111	3.998	2.795	0.041	100.433
Atho-g-6	75.343	0.288	12.127	3.36498	0.093	1.661	0.093	4.01	2.724	0.031	99.735
Atho-g-7	75.887	0.3	12.183	3.35759	0.09	1.679	0.09	3.87	2.625	0.063	100.145
Atho-g-8	75.433	0.286	12.222	3.23183	0.102	1.689	0.087	3.943	2.691	0.015	99.6998
Atho-g-9	75.597	0.264	11.994	3.26974	0.094	1.605	0.084	3.812	2.684	0.05	99.4537
Atho-g-10	75.851	0.281	12.114	3.31782	0.165	1.627	0.069	4.117	2.702	0.007	100.251
Atho-g-11	75.729	0.334	12.139	3.28916	0.087	1.615	0.063	3.868	2.629	0.02	99.7732
Atho-g-12	76.001	0.272	12.074	3.29378	0.106	1.707	0.1	3.864	2.574	0.041	100.033
Atho-g-13	76.031	0.278	12.157	3.26697	0.105	1.665	0.089	3.986	2.687	0.041	100.306
Atho-g-14	75.308	0.268	12.247	3.32707	0.097	1.583	0.082	3.846	2.763	0.019	99.5401
Atho-g-15	75.004	0.292	12.288	3.29656	0.123	1.678	0.093	3.923	2.73	0.031	99.4586
ATHO-G-16	75.342	0.282	12.173	3.26789	0.123	1.684	0.09	3.902	2.709	0.066	99.6389
ATHO-G-17	76.024	0.284	12.227	3.2984	0.142	1.693	0.101	3.84	2.704	0.018	100.331
ATHO-G-18	75.842	0.276	12.034	3.26234	0.13	1.611	0.095	3.873	2.751	0.046	99.9203
ATHO-G-19	75.609	0.306	12.129	3.35204	0.127	1.659	0.054	3.818	2.729	0.04	99.823
ATHO-G-20	75.956	0.289	12.288	3.328	0.144	1.585	0.086	3.945	2.725	0.042	100.388
ATHO-G-21	75.506	0.3	12.221	3.34187	0.142	1.874	0.106	3.831	2.672	0.088	100.082
ATHO-G-22	75.817	0.249	12.402	3.31228	0.116	1.695	0.055	4.175	2.69	0.035	100.546
ATHO-G-23	75.262	0.297	12.184	3.26789	0.08	1.626	0.103	4.252	2.729	0.044	99.8449
ATHO-G-24	75.446	0.292	12.163	3.21056	0.007	1.687	0.102	3.978	2.716	0.037	99.6386
ATHO-G-25	75.859	0.286	12.23	3.20686	0.16	1.584	0.087	3.941	2.626	0.057	100.037
ATHO-G-26	75.707	0.303	12.111	3.3206	0.108	1.71	0.094	3.902	2.717	0.046	100.019
average	75.6368	0.292231	12.1765	3.29136	0.113577	1.66885	0.0843462	3.93154	2.68273	0.0407308
stdev	0.283116	0.0206016	0.0896523	0.0513761	0.0322753	0.05946	0.0175452	0.112579	0.0609023	0.0175147
ATHO-G values in GeoReM
	75.6	0.26	12.2	3.27	0.106	1.7	0.103	3.75	2.64	0.043
Notes: All analyses done at the Department of Earth Sciences, University of Toronto. See Methods section for details on analytical
procedures.
